# Supplementary material
Source: PubMed Central journal article supplement (PMC3923450)
Supplement: pr400897t_si_001.pdf [file pr400897t_si_001.pdf]

## ***Supplementary Information***

A targeted *in vivo* SILAC approach for quantification of drug metabolism enzymes; regulation by the constitutive androstane receptor

*A. Kenneth MacLeod, Tuo Zang, Zoe Riches, Colin J. Henderson, C. Roland Wolf and Jeffrey T.-J. Huang\**

Jacqui Wood Cancer Centre, Medical Research Institute, Ninewell Hospital and Medical School, University of Dundee, James Arrott Drive, DD1 9SY, Scotland.

*\*Corresponding author:*

*Jeffrey T.-J. Huang*

*Jacqui Wood Cancer Centre*

*Medical Research Institute*

*University of Dundee*

*Dundee, DD1 9SY*

*Tel: +44 (0)1382 386901*

[j.t.j.huang@dundee.ac.uk](mailto:j.t.j.huang@dundee.ac.uk)

## INDEX

### Supplementary Figures

**Supplementary Figure S-1:** Distribution of the number of peptides in each DME protein retained or discarded after linearity filtering.....Page 4

**Supplementary Figure S-2:** Coomassie Brilliant Blue R-250 staining to confirm equality of microsomal protein sample loading on SDS-PAGE gels.....Page 4

**Supplementary Figure S-3:** Effect of TCPOBOP treatment to the expression of four proteins (albumin, calreticulin,  $\alpha$ -tubulin and  $\beta$ -tubulin) in liver.....Page 5

**Description of data deposited in ProteomeExchange**.....Page 6

### Supplementary Tables

**Supplementary Table S-1:** Peptides/proteins identified in 13C6 liver lysate following in-gel digestion protocol. Data were exported from PEAKS (FDR = 0.1%,  $-10\text{LogP} = 17.3$ ).

**Supplementary Table S-2:** Peptides/proteins identified in 13C6 liver lysate following FASP protocol. Data were exported from PEAKS (FDR = 0.1%,  $-10\text{LogP} = 22.9$ ).

**Supplementary Table S-3:** Summary of DME identified by in-gel digestion versus FASP derived from Supplementary Table S-1 and 2.

**Supplementary Table S-4:** Analysis of linearity of drug metabolism enzyme DME region 1 peptides (output from SIEVE). Integrated peak areas calculated by SIEVE are presented in columns Q-V, with two technical replicates for each of the four heavy: light sample input

ratios. Ratios of K0: K6 signals were then calculated, and values are shown in columns X-AC. Technical replicate ratios were averaged (columns AE-AG),  $\log_4$ -transformed (columns AI-AK) and  $R^2$  values calculated (column AM).

**Supplementary Table S-5:** Analysis of linearity of drug metabolism enzyme DME region 2 peptides (output from SIEVE). Integrated peak areas calculated by SIEVE are presented in columns Q-V, with two technical replicates for each of the four heavy: light sample input ratios. Ratios of K0: K6 signals were then calculated, and values are shown in columns X-AC. Technical replicate ratios were averaged (columns AE-AG),  $\log_4$ -transformed (columns AI-AK) and  $R^2$  values calculated (column AM).

**Supplementary Table S-6:** DME region 1 seed file

**Supplementary Table S-7:** DME region 2 seed file

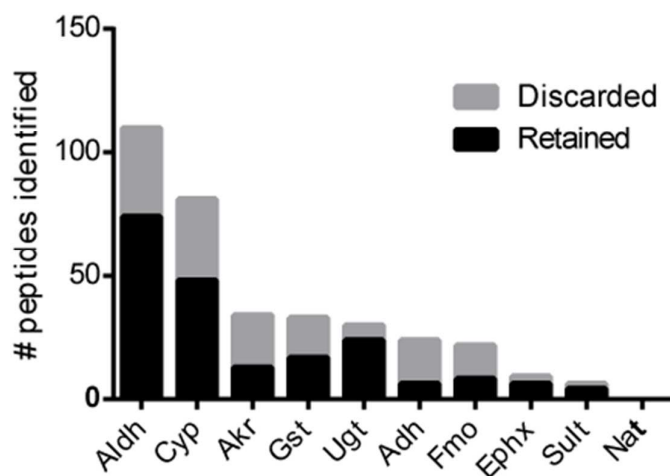

**Supplementary Figure 1.** Distribution of the number of peptides in each DME protein retained or discarded after linearity filtering. Filtering of peptides was based on linearity of signal across heavy: light sample input ratios. Of the unique, lysine-containing peptides identified, approximately 57% demonstrated satisfactory linearity.

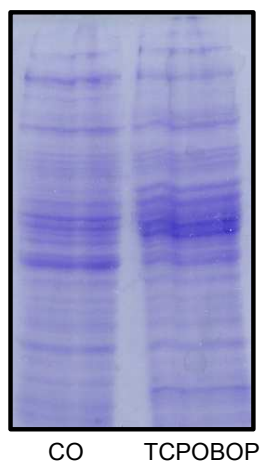

**Supplementary Figure 2.** Coomassie Brilliant Blue R-250 staining to confirm equality of microsomal protein sample loading on SDS-PAGE gels.

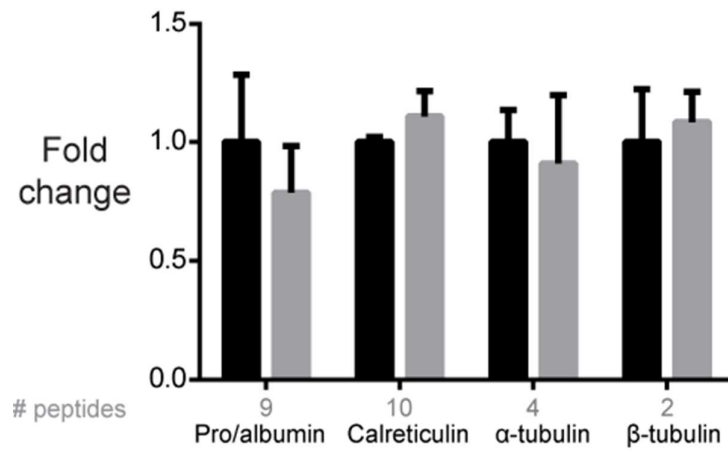

**Supplementary Figure 3.** Effect of TCPOBOP treatment to the expression of four proteins

(albumin, calreticulin,  $\alpha$ -tubulin and  $\beta$ -tubulin) in liver.

tHR/SIM-*in vivo* SILAC analysis of modulation of control protein/protein groups by

TCPOBOP. Black bars: corn oil, grey bars: TCPOBOP.

## Description of data deposited in ProteomeExchange.

| Table / Figure / File   | File name                                             | File type |
|-------------------------|-------------------------------------------------------|-----------|
| Supplementary Table S-1 | DME region 1 replicate 1                              | RAW       |
|                         | DME region 1 replicate 2                              | RAW       |
|                         | DME region 2 replicate 1                              | RAW       |
|                         | DME region 2 replicate 2                              | RAW       |
|                         | In gel digest DME regions 1 and 2 combined PEAKS file | RESULT    |
| Supplementary Table S-2 | FASP replicate 1                                      | RAW       |
|                         | FASP replicate 2                                      | RAW       |
|                         | FASP replicate 3                                      | RAW       |
|                         | FASP replicate 4                                      | RAW       |
|                         | FASP PEAKS file                                       | RESULT    |
| Supplementary Table S-4 | DME region 1, Heavy:light 1:1 replicate 1             | RAW       |
|                         | DME region 1, Heavy:light 1:1 replicate 2             | RAW       |
|                         | DME region 1, Heavy:light 1:0.25 replicate 1          | RAW       |
|                         | DME region 1, Heavy:light 1:0.25 replicate 2          | RAW       |
|                         | DME region 1, Heavy:light 1:0.0625 replicate 1        | RAW       |
|                         | DME region 1, Heavy:light 1:0.0625 replicate 2        | RAW       |
|                         | DME region 1 linearity SIEVE file                     | OTHER     |
| Supplementary Table S-5 | DME region 2, Heavy:light 1:1 replicate 1             | RAW       |
|                         | DME region 2, Heavy:light 1:1 replicate 2             | RAW       |
|                         | DME region 2, Heavy:light 1:0.25 replicate 1          | RAW       |
|                         | DME region 2, Heavy:light 1:0.25 replicate 2          | RAW       |
|                         | DME region 2, Heavy:light 1:0.0625 replicate 1        | RAW       |
|                         | DME region 2, Heavy:light 1:0.0625 replicate 2        | RAW       |
|                         | DME region 2 linearity SIEVE file                     | OTHER     |
| Figure 3                | DME region 1, corn oil 1 replicate 1                  | RAW       |
|                         | DME region 1, corn oil 1 replicate 2                  | RAW       |
|                         | DME region 1, corn oil 2 replicate 1                  | RAW       |
|                         | DME region 1, corn oil 2 replicate 2                  | RAW       |
|                         | DME region 1, corn oil 3 replicate 1                  | RAW       |
|                         | DME region 1, corn oil 3 replicate 2                  | RAW       |
|                         | DME region 1, TCPOBOP 1 replicate 1                   | RAW       |
|                         | DME region 1, TCPOBOP 1 replicate 2                   | RAW       |
|                         | DME region 1, TCPOBOP 2 replicate 1                   | RAW       |
|                         | DME region 1, TCPOBOP 2 replicate 2                   | RAW       |
|                         | DME region 1, TCPOBOP 3 replicate 1                   | RAW       |
|                         | DME region 1, TCPOBOP 3 replicate 2                   | RAW       |
|                         | DME region 2, corn oil 1 replicate 1                  | RAW       |
|                         | DME region 2, corn oil 1 replicate 2                  | RAW       |
|                         | DME region 2, corn oil 2 replicate 1                  | RAW       |
|                         | DME region 2, corn oil 2 replicate 2                  | RAW       |
|                         | DME region 2, corn oil 3 replicate 1                  | RAW       |
|                         | DME region 2, corn oil 3 replicate 2                  | RAW       |
|                         | DME region 2, TCPOBOP 1 replicate 1                   | RAW       |
|                         | DME region 2, TCPOBOP 1 replicate 2                   | RAW       |
|                         | DME region 2, TCPOBOP 2 replicate 1                   | RAW       |
|                         | DME region 2, TCPOBOP 2 replicate 2                   | RAW       |
|                         | DME region 2, TCPOBOP 3 replicate 1                   | RAW       |
|                         | DME region 2, TCPOBOP 3 replicate 2                   | RAW       |
|                         | DME region 1 corn oil versus TCPOBOP SIEVE file       | OTHER     |
|                         | DME region 2 corn oil versus TCPOBOP SIEVE file       | OTHER     |
| Supplementary File S-1  | LTQ-Orbitrap_method file                              | OTHER     |
| Supplementary File S-2  | positive tune file_fibrinogen                         | OTHER     |
